# Supplementary material for: Nursing Education during the SARS-CoV-2 Pandemic: Assessment of Students’ Satisfaction with e-Learning Environment
Source: MDPI journal article supplement (doi:10.3390/ijerph19042023), 2022-02-11
Supplement: s1 [file s1]

**Table S1.** Distribution of the sample by educational institution.

| <b>University Center</b>                                | <b>N</b> | <b>%</b> |
|---------------------------------------------------------|----------|----------|
| Centro Universitario de Enfermería "San Juan de Dios"   | 4        | 1        |
| Centro Universitario de Enfermería de Cruz Roja         | 17       | 4.3      |
| CEU San Pablo                                           | 1        | 0.3      |
| Escuela de Enfermería Salus Infirmorum                  | 11       | 2.8      |
| Escuela Universitaria de Osuna                          | 7        | 1.8      |
| EUE Gijón                                               | 1        | 0.3      |
| Europea                                                 | 1        | 0.3      |
| Fundación Jiménez Díaz                                  | 5        | 1.3      |
| UAH                                                     | 1        | 0.3      |
| Ucav                                                    | 1        | 0.3      |
| Universidad Autónoma de Madrid                          | 4        | 1        |
| Universidad Católica de Ávila                           | 3        | 0.8      |
| Universidad Católica de Murcia                          | 13       | 3.3      |
| Universidad Complutense de Madrid                       | 2        | 0.5      |
| Universidad de Alcalá de Henares                        | 1        | 0.3      |
| Universidad de Alicante                                 | 1        | 0.3      |
| Universidad de Burgos                                   | 3        | 0.8      |
| Universidad de Cádiz                                    | 42       | 10.5     |
| Universidad de Cantabria                                | 1        | 0.3      |
| Universidad de Castilla la Mancha                       | 7        | 1.8      |
| Universidad de Chile                                    | 5        | 1.3      |
| Universidad de Córdoba                                  | 15       | 3.8      |
| Universidad de Extremadura                              | 9        | 2.3      |
| Universidad de Granada                                  | 9        | 2.3      |
| Universidad de Huelva                                   | 122      | 30.6     |
| Universidad de Jaén                                     | 11       | 2.8      |
| Universidad de las Américas                             | 1        | 0.3      |
| Universidad de las Islas Baleares                       | 1        | 0.3      |
| Universidad de las Palmas                               | 4        | 1        |
| Universidad de León                                     | 2        | 0.5      |
| Universidad de Lleida                                   | 3        | 0.8      |
| Universidad de Málaga                                   | 1        | 0.3      |
| Universidad de Murcia                                   | 4        | 1        |
| Universidad de Navarra                                  | 8        | 2        |
| Universidad de Osuna                                    | 1        | 0.3      |
| Universidad de Oviedo                                   | 13       | 3.3      |
| Universidad de Oviedo (Facultad de Enfermería de Gijón) | 1        | 0.3      |

|                                       |     |     |
|---------------------------------------|-----|-----|
| Universidad de Plasencia              | 1   | 0.3 |
| Universidad de Salamanca              | 11  | 2.8 |
| Universidad de Salamanca (USAL)       | 1   | 0.3 |
| Universidad de Santiago de Compostela | 6   | 1.5 |
| Universidad de Sevilla                | 16  | 4   |
| Universidad de Valencia               | 1   | 0.3 |
| Universidad de Vigo                   | 1   | 0.3 |
| Universidad de Zaragoza               | 1   | 0.3 |
| Universidad Europea de Madrid         | 1   | 0.3 |
| Universidad Francisco de Vitoria      | 14  | 3.5 |
| Universidad Pompeu Fabra              | 1   | 0.3 |
| Universidad Pontificia de Salamanca   | 1   | 0.3 |
| Universidad pública del País Vasco    | 1   | 0.3 |
| Universidad de Chaves                 | 1   | 0.3 |
| Universitat de Barcelona              | 3   | 0.8 |
| Universitat de Lleida                 | 1   | 0.3 |
| Universitat Rovira i Virgili          | 3   | 0.8 |
| Total                                 | 400 | 100 |
